# Supplementary material for: Insights on the coupling between vibronically active molecular vibrations and lattice phonons in molecular nanomagnets
Source: Royal Society of Chemistry journal article supplement (doi:10.1039/d1dt01832a), 2021-01-01
Supplement: d1dt01832a1.pdf [file d1dt01832a1.pdf]

Electronic Supplementary Information for  
"Insights on the coupling between vibronically  
active molecular vibrations and lattice  
phonons in molecular nanomagnets"

Aman Ullah, José J. Baldoví, Alejandro Gaita-Ariño,\* and Eugenio Coronado

*Instituto de Ciencia Molecular, Universitat de Valencia, Paterna 46980, Spain*

E-mail: [gaita@uv.es](mailto:gaita@uv.es)

## Supplementary Tables

Table S1: Frequencies ( $\text{cm}^{-1}$ ), vibronic coupling ( $S_n$  ( $\text{cm}^{-1}$ ) at CASSCF level for optimized geometry for each normal mode ( $n$ ) and vibronic-phonon couplings  $S(\mu_{n,xx})$ ,  $S(\mu_{n,xy})$ ,  $S(\mu_{n,xz})$ .

| Modes (n) | Frequencies<br>( $\text{cm}^{-1}$ ) | $S_n$ ( $\text{cm}^{-1}$ ) | S (n, $\mu_{xx}$ ) | S (n, $\mu_{xy}$ ) | S (n, $\mu_{xz}$ ) |
|-----------|-------------------------------------|----------------------------|--------------------|--------------------|--------------------|
| 1         | 8.62                                | 0.085                      | 0.01               | 0.01               | 0.01               |
| 2         | 17.94                               | 0.176                      | 0.14               | 0.03               | 0.01               |
| 3         | 18.43                               | 0.119                      | 0.03               | 0.04               | 0.01               |
| 4         | 24.33                               | 0.247                      | 0.00               | 0.13               | 0.01               |
| 5         | 29.97                               | 0.220                      | 0.01               | 0.01               | 0.13               |
| 6         | 43.22                               | 0.123                      | 0.91               | 0.01               | 0.01               |
| 7         | 54.02                               | 0.150                      | 0.26               | 0.03               | 0.00               |
| 8         | 58.39                               | 0.180                      | 0.01               | 0.01               | 0.03               |
| 9         | 67.12                               | 0.145                      | 0.17               | 0.01               | 0.00               |
| 10        | 70.95                               | 0.130                      | 0.04               | 0.05               | 0.01               |
| 11        | 99.61                               | 0.125                      | 0.01               | 0.07               | 0.01               |
| 12        | 106.52                              | 0.151                      | 0.02               | 0.01               | 0.07               |
| 13        | 106.78                              | 0.051                      | 0.01               | 0.01               | 0.04               |
| 14        | 107.26                              | 0.132                      | 0.00               | 0.06               | 0.01               |
| 15        | 108.76                              | 0.167                      | 0.01               | 0.00               | 0.00               |
| 16        | 114.68                              | 0.067                      | 0.01               | 0.00               | 0.00               |
| 17        | 114.71                              | 0.080                      | 0.01               | 0.00               | 0.00               |
| 18        | 140.11                              | 0.109                      | 0.01               | 0.01               | 0.00               |
| 19        | 140.76                              | 0.040                      | 0.04               | 0.00               | 0.01               |
| 20        | 141.19                              | 0.038                      | 0.00               | 0.01               | 0.04               |
| 21        | 142.11                              | 0.129                      | 0.01               | 0.04               | 0.00               |

Table S1: Continued from previous page

| Modes (n) | Frequencies<br>( $\text{cm}^{-1}$ ) | $S_n$ ( $\text{cm}^{-1}$ ) | S (n, $\mu_{xx}$ ) | S (n, $\mu_{xy}$ ) | S (n, $\mu_{xz}$ ) |
|-----------|-------------------------------------|----------------------------|--------------------|--------------------|--------------------|
| 22        | 143.98                              | 0.123                      | 0.09               | 0.01               | 0.00               |
| 23        | 144.75                              | 0.039                      | 0.02               | 0.06               | 0.00               |
| 24        | 157.60                              | 0.020                      | 0.00               | 0.00               | 0.02               |
| 25        | 158.17                              | 0.081                      | 0.00               | 0.02               | 0.23               |
| 26        | 159.14                              | 0.096                      | 0.00               | 0.28               | 0.02               |
| 27        | 159.88                              | 0.042                      | 0.00               | 0.08               | 0.03               |
| 28        | 160.56                              | 0.039                      | 0.00               | 0.03               | 0.12               |
| 29        | 161.30                              | 0.079                      | 0.01               | 0.06               | 0.08               |
| 30        | 167.76                              | 0.094                      | 0.00               | 0.00               | 0.00               |
| 31        | 167.77                              | 0.083                      | 0.01               | 0.02               | 0.00               |
| 32        | 184.62                              | 0.122                      | 0.00               | 0.00               | 0.01               |
| 33        | 184.73                              | 0.122                      | 0.00               | 0.01               | 0.00               |
| 34        | 193.02                              | 0.038                      | 0.01               | 0.01               | 0.01               |
| 35        | 202.14                              | 0.095                      | 0.15               | 0.00               | 0.00               |
| 36        | 216.40                              | 0.027                      | 0.02               | 0.02               | 0.01               |
| 37        | 216.89                              | 0.066                      | 0.00               | 0.02               | 0.03               |
| 38        | 218.12                              | 0.088                      | 0.00               | 0.00               | 0.06               |
| 39        | 218.13                              | 0.099                      | 0.01               | 0.02               | 0.06               |
| 40        | 218.22                              | 0.126                      | 0.01               | 0.11               | 0.08               |
| 41        | 218.24                              | 0.117                      | 0.00               | 0.11               | 0.07               |
| 42        | 219.96                              | 0.057                      | 0.01               | 0.01               | 0.02               |
| 43        | 220.00                              | 0.054                      | 0.00               | 0.14               | 0.02               |
| 44        | 220.07                              | 0.115                      | 0.00               | 0.01               | 0.18               |
| 45        | 220.47                              | 0.111                      | 0.03               | 0.05               | 0.02               |

Table S1: Continued from previous page

| Modes (n) | Frequencies<br>( $\text{cm}^{-1}$ ) | $S_n$ ( $\text{cm}^{-1}$ ) | S (n, $\mu_{xx}$ ) | S (n, $\mu_{xy}$ ) | S (n, $\mu_{xz}$ ) |
|-----------|-------------------------------------|----------------------------|--------------------|--------------------|--------------------|
| 46        | 223.18                              | 0.079                      | 0.05               | 0.08               | 0.01               |
| 47        | 224.41                              | 0.072                      | 0.05               | 0.04               | 0.01               |
| 48        | 230.85                              | 0.034                      | 0.01               | 0.01               | 0.00               |
| 49        | 231.24                              | 0.031                      | 0.01               | 0.01               | 0.02               |
| 50        | 231.75                              | 0.036                      | 0.00               | 0.02               | 0.02               |
| 51        | 232.10                              | 0.036                      | 0.01               | 0.02               | 0.00               |
| 52        | 235.13                              | 0.019                      | 0.00               | 0.00               | 0.01               |
| 53        | 235.33                              | 0.029                      | 0.01               | 0.00               | 0.00               |
| 54        | 257.49                              | 0.097                      | 0.00               | 0.00               | 0.00               |
| 55        | 257.49                              | 0.108                      | 0.01               | 0.00               | 0.00               |
| 56        | 289.55                              | 0.030                      | 0.00               | 0.00               | 0.00               |
| 57        | 291.07                              | 0.025                      | 0.00               | 0.00               | 0.00               |
| 58        | 329.19                              | 0.091                      | 0.00               | 0.00               | 0.02               |
| 59        | 329.25                              | 0.125                      | 0.00               | 0.02               | 0.01               |
| 60        | 337.26                              | 0.101                      | 0.00               | 0.02               | 0.02               |
| 61        | 337.36                              | 0.143                      | 0.00               | 0.02               | 0.04               |
| 62        | 337.40                              | 0.099                      | 0.00               | 0.03               | 0.00               |
| 63        | 337.72                              | 0.101                      | 0.00               | 0.02               | 0.01               |
| 64        | 351.19                              | 0.101                      | 0.00               | 0.08               | 0.03               |
| 65        | 354.95                              | 0.147                      | 0.00               | 0.07               | 0.21               |
| 66        | 355.21                              | 0.148                      | 0.00               | 0.20               | 0.08               |
| 67        | 359.02                              | 0.064                      | 0.01               | 0.00               | 0.00               |
| 68        | 360.26                              | 0.032                      | 0.02               | 0.01               | 0.00               |
| 69        | 363.49                              | 0.085                      | 0.00               | 0.04               | 0.02               |

Table S1: Continued from previous page

| Modes (n) | Frequencies<br>( $\text{cm}^{-1}$ ) | $S_n$ ( $\text{cm}^{-1}$ ) | S (n, $\mu_{xx}$ ) | S (n, $\mu_{xy}$ ) | S (n, $\mu_{xz}$ ) |
|-----------|-------------------------------------|----------------------------|--------------------|--------------------|--------------------|
| 70        | 399.03                              | 0.041                      | 0.02               | 0.05               | 0.06               |
| 71        | 399.78                              | 0.067                      | 0.01               | 0.07               | 0.05               |
| 72        | 399.80                              | 0.053                      | 0.02               | 0.01               | 0.03               |
| 73        | 404.19                              | 0.083                      | 0.30               | 0.00               | 0.00               |
| 74        | 414.55                              | 0.141                      | 0.01               | 0.26               | 0.03               |
| 75        | 414.92                              | 0.126                      | 0.00               | 0.04               | 0.27               |
| 76        | 416.67                              | 0.116                      | 0.00               | 0.07               | 0.18               |
| 77        | 416.90                              | 0.111                      | 0.04               | 0.14               | 0.06               |
| 78        | 417.53                              | 0.131                      | 0.02               | 0.10               | 0.06               |
| 79        | 417.69                              | 0.120                      | 0.02               | 0.06               | 0.04               |
| 80        | 429.95                              | 0.091                      | 0.00               | 0.03               | 0.00               |
| 81        | 431.15                              | 0.065                      | 0.35               | 0.01               | 0.00               |
| 82        | 435.19                              | 0.083                      | 0.01               | 0.01               | 0.17               |
| 83        | 436.31                              | 0.046                      | 0.03               | 0.05               | 0.05               |
| 84        | 436.72                              | 0.078                      | 0.07               | 0.15               | 0.03               |
| 85        | 437.91                              | 0.056                      | 0.15               | 0.08               | 0.00               |
| 86        | 479.05                              | 0.084                      | 0.00               | 0.21               | 0.01               |
| 87        | 479.34                              | 0.070                      | 0.00               | 0.01               | 0.21               |
| 88        | 480.96                              | 0.037                      | 0.01               | 0.01               | 0.00               |
| 89        | 481.29                              | 0.038                      | 0.00               | 0.00               | 0.03               |
| 90        | 489.34                              | 0.055                      | 0.00               | 0.02               | 0.01               |
| 91        | 489.38                              | 0.054                      | 0.00               | 0.00               | 0.02               |
| 92        | 514.29                              | 0.028                      | 0.00               | 0.00               | 0.00               |
| 93        | 515.09                              | 0.031                      | 0.01               | 0.00               | 0.01               |

Table S1: Continued from previous page

| Modes (n) | Frequencies<br>( $\text{cm}^{-1}$ ) | $S_n$ ( $\text{cm}^{-1}$ ) | S (n, $\mu_{xx}$ ) | S (n, $\mu_{xy}$ ) | S (n, $\mu_{xz}$ ) |
|-----------|-------------------------------------|----------------------------|--------------------|--------------------|--------------------|
| 94        | 515.25                              | 0.029                      | 0.02               | 0.00               | 0.01               |
| 95        | 516.21                              | 0.076                      | 0.12               | 0.00               | 0.00               |
| 96        | 520.31                              | 0.113                      | 0.00               | 0.01               | 0.01               |
| 97        | 521.09                              | 0.102                      | 0.01               | 0.01               | 0.01               |
| 98        | 528.07                              | 0.086                      | 0.04               | 0.01               | 0.00               |
| 99        | 529.22                              | 0.079                      | 0.01               | 0.00               | 0.01               |
| 100       | 530.46                              | 0.069                      | 0.09               | 0.00               | 0.00               |
| 101       | 531.81                              | 0.080                      | 0.19               | 0.01               | 0.00               |
| 102       | 535.59                              | 0.091                      | 0.00               | 0.00               | 0.01               |
| 103       | 536.21                              | 0.097                      | 0.05               | 0.02               | 0.00               |
| 104       | 554.98                              | 0.020                      | 0.00               | 0.00               | 0.00               |
| 105       | 555.04                              | 0.018                      | 0.00               | 0.00               | 0.00               |
| 106       | 578.43                              | 0.031                      | 0.01               | 0.14               | 0.01               |
| 107       | 579.04                              | 0.042                      | 0.01               | 0.06               | 0.11               |
| 108       | 579.13                              | 0.027                      | 0.02               | 0.14               | 0.01               |
| 109       | 579.49                              | 0.033                      | 0.00               | 0.02               | 0.18               |
| 110       | 671.58                              | 0.235                      | 0.00               | 0.25               | 0.01               |

Table S2: For normal mode n, vibronic-phonon couplings  $S(\mu_{n,yx})$ ,  $S(\mu_{n,yy})$ ,  $S(\mu_{n,yz})$ ,  $S(\mu_{n,zx})$ ,  $S(\mu_{n,zy})$ ,  $S(\mu_{n,zz})$ .

| Modes (n) | S (n, $\mu_{yx}$ ) | S (n, $\mu_{yy}$ ) | S (n, $\mu_{yz}$ ) | S (n, $\mu_{zx}$ ) | S (n, $\mu_{zy}$ ) | S (n, $\mu_{zz}$ ) |
|-----------|--------------------|--------------------|--------------------|--------------------|--------------------|--------------------|
| 1         | 0.03               | 0.01               | 0.00               | 0.04               | 0.00               | 0.00               |
| 2         | 0.13               | 0.03               | 0.00               | 0.02               | 0.01               | 0.04               |
| 3         | 0.21               | 0.01               | 0.02               | 0.04               | 0.02               | 0.01               |

Table S2: Continued from previous page

| Modes (n) | S (n, $\mu_{yx}$ ) | S (n, $\mu_{yy}$ ) | S (n, $\mu_{yz}$ ) | S (n, $\mu_{zx}$ ) | S (n, $\mu_{zy}$ ) | S (n, $\mu_{zz}$ ) |
|-----------|--------------------|--------------------|--------------------|--------------------|--------------------|--------------------|
| 4         | 0.65               | 0.05               | 0.01               | 0.05               | 0.01               | 0.05               |
| 5         | 0.06               | 0.01               | 0.04               | 0.69               | 0.05               | 0.01               |
| 6         | 0.06               | 0.00               | 0.01               | 0.00               | 0.00               | 0.06               |
| 7         | 0.14               | 0.31               | 0.02               | 0.01               | 0.02               | 0.25               |
| 8         | 0.02               | 0.03               | 0.33               | 0.11               | 0.34               | 0.02               |
| 9         | 0.05               | 0.20               | 0.01               | 0.01               | 0.01               | 0.28               |
| 10        | 0.03               | 0.03               | 0.07               | 0.01               | 0.08               | 0.03               |
| 11        | 0.32               | 0.00               | 0.01               | 0.04               | 0.01               | 0.00               |
| 12        | 0.04               | 0.01               | 0.01               | 0.41               | 0.01               | 0.01               |
| 13        | 0.06               | 0.01               | 0.01               | 0.27               | 0.01               | 0.01               |
| 14        | 0.43               | 0.00               | 0.00               | 0.05               | 0.02               | 0.00               |
| 15        | 0.08               | 0.07               | 0.06               | 0.01               | 0.08               | 0.07               |
| 16        | 0.03               | 0.13               | 0.15               | 0.00               | 0.14               | 0.13               |
| 17        | 0.01               | 0.10               | 0.10               | 0.03               | 0.08               | 0.08               |
| 18        | 0.12               | 0.02               | 0.02               | 0.00               | 0.02               | 0.02               |
| 19        | 0.01               | 0.12               | 0.01               | 0.00               | 0.00               | 0.14               |
| 20        | 0.01               | 0.00               | 0.01               | 0.18               | 0.00               | 0.00               |
| 21        | 0.17               | 0.05               | 0.04               | 0.02               | 0.01               | 0.06               |
| 22        | 0.03               | 0.38               | 0.00               | 0.00               | 0.01               | 0.37               |
| 23        | 0.02               | 0.05               | 0.08               | 0.04               | 0.01               | 0.03               |
| 24        | 0.01               | 0.00               | 0.45               | 0.02               | 0.45               | 0.01               |
| 25        | 0.02               | 0.00               | 0.03               | 0.20               | 0.04               | 0.01               |
| 26        | 0.23               | 0.01               | 0.06               | 0.01               | 0.04               | 0.01               |
| 27        | 0.06               | 0.05               | 0.14               | 0.02               | 0.11               | 0.03               |
| 28        | 0.02               | 0.01               | 0.17               | 0.09               | 0.18               | 0.00               |

Table S2: Continued from previous page

| Modes (n) | S (n, $\mu_{yx}$ ) | S (n, $\mu_{yy}$ ) | S (n, $\mu_{yz}$ ) | S (n, $\mu_{zx}$ ) | S (n, $\mu_{zy}$ ) | S (n, $\mu_{zz}$ ) |
|-----------|--------------------|--------------------|--------------------|--------------------|--------------------|--------------------|
| 29        | 0.03               | 0.03               | 0.15               | 0.07               | 0.21               | 0.01               |
| 30        | 0.01               | 0.35               | 0.19               | 0.01               | 0.19               | 0.35               |
| 31        | 0.02               | 0.19               | 0.38               | 0.01               | 0.33               | 0.19               |
| 32        | 0.00               | 0.00               | 0.01               | 0.01               | 0.01               | 0.00               |
| 33        | 0.01               | 0.03               | 0.01               | 0.00               | 0.00               | 0.01               |
| 34        | 0.02               | 0.01               | 0.00               | 0.00               | 0.00               | 0.01               |
| 35        | 0.00               | 0.17               | 0.02               | 0.00               | 0.01               | 0.19               |
| 36        | 0.01               | 0.04               | 0.02               | 0.00               | 0.01               | 0.06               |
| 37        | 0.03               | 0.01               | 0.09               | 0.01               | 0.08               | 0.04               |
| 38        | 0.00               | 0.15               | 0.17               | 0.03               | 0.16               | 0.16               |
| 39        | 0.00               | 0.18               | 0.12               | 0.03               | 0.12               | 0.17               |
| 40        | 0.04               | 0.04               | 0.05               | 0.03               | 0.05               | 0.05               |
| 41        | 0.06               | 0.06               | 0.09               | 0.02               | 0.09               | 0.03               |
| 42        | 0.02               | 0.05               | 0.01               | 0.02               | 0.01               | 0.01               |
| 43        | 0.16               | 0.02               | 0.01               | 0.02               | 0.01               | 0.03               |
| 44        | 0.01               | 0.01               | 0.02               | 0.20               | 0.02               | 0.00               |
| 45        | 0.06               | 0.10               | 0.03               | 0.01               | 0.05               | 0.06               |
| 46        | 0.09               | 0.10               | 0.01               | 0.01               | 0.02               | 0.09               |
| 47        | 0.07               | 0.07               | 0.02               | 0.01               | 0.04               | 0.10               |
| 48        | 0.00               | 0.01               | 0.01               | 0.01               | 0.00               | 0.00               |
| 49        | 0.00               | 0.00               | 0.00               | 0.02               | 0.00               | 0.01               |
| 50        | 0.00               | 0.01               | 0.00               | 0.02               | 0.02               | 0.01               |
| 51        | 0.04               | 0.00               | 0.01               | 0.00               | 0.01               | 0.01               |
| 52        | 0.00               | 0.00               | 0.18               | 0.00               | 0.18               | 0.00               |
| 53        | 0.01               | 0.00               | 0.11               | 0.00               | 0.11               | 0.00               |



Table S2: Continued from previous page

| Modes (n) | S (n, $\mu_{yx}$ ) | S (n, $\mu_{yy}$ ) | S (n, $\mu_{yz}$ ) | S (n, $\mu_{zx}$ ) | S (n, $\mu_{zy}$ ) | S (n, $\mu_{zz}$ ) |
|-----------|--------------------|--------------------|--------------------|--------------------|--------------------|--------------------|
| 54        | 0.00               | 0.01               | 0.00               | 0.00               | 0.01               | 0.01               |
| 55        | 0.02               | 0.00               | 0.01               | 0.01               | 0.01               | 0.00               |
| 56        | 0.00               | 0.00               | 0.02               | 0.00               | 0.01               | 0.00               |
| 57        | 0.01               | 0.00               | 0.00               | 0.00               | 0.00               | 0.00               |
| 58        | 0.00               | 0.01               | 0.10               | 0.02               | 0.10               | 0.01               |
| 59        | 0.03               | 0.10               | 0.01               | 0.01               | 0.02               | 0.10               |
| 60        | 0.03               | 0.01               | 0.01               | 0.03               | 0.00               | 0.00               |
| 61        | 0.02               | 0.00               | 0.00               | 0.05               | 0.00               | 0.00               |
| 62        | 0.05               | 0.00               | 0.00               | 0.01               | 0.00               | 0.00               |
| 63        | 0.01               | 0.00               | 0.01               | 0.04               | 0.01               | 0.01               |
| 64        | 0.14               | 0.01               | 0.00               | 0.06               | 0.00               | 0.00               |
| 65        | 0.12               | 0.00               | 0.01               | 0.39               | 0.01               | 0.00               |
| 66        | 0.37               | 0.00               | 0.01               | 0.15               | 0.00               | 0.00               |
| 67        | 0.01               | 0.05               | 0.00               | 0.00               | 0.01               | 0.05               |
| 68        | 0.02               | 0.05               | 0.00               | 0.01               | 0.00               | 0.06               |
| 69        | 0.08               | 0.02               | 0.01               | 0.04               | 0.02               | 0.02               |
| 70        | 0.02               | 0.02               | 0.04               | 0.02               | 0.03               | 0.03               |
| 71        | 0.03               | 0.02               | 0.02               | 0.02               | 0.02               | 0.03               |
| 72        | 0.00               | 0.01               | 0.01               | 0.00               | 0.00               | 0.03               |
| 73        | 0.00               | 0.12               | 0.00               | 0.00               | 0.00               | 0.11               |
| 74        | 0.02               | 0.10               | 0.00               | 0.00               | 0.00               | 0.09               |
| 75        | 0.00               | 0.01               | 0.09               | 0.01               | 0.09               | 0.01               |
| 76        | 0.00               | 0.02               | 0.06               | 0.00               | 0.06               | 0.01               |
| 77        | 0.01               | 0.00               | 0.03               | 0.01               | 0.03               | 0.01               |
| 78        | 0.01               | 0.16               | 0.05               | 0.01               | 0.05               | 0.17               |

Table S2: Continued from previous page

| Modes (n) | S (n, $\mu_{yx}$ ) | S (n, $\mu_{yy}$ ) | S (n, $\mu_{yz}$ ) | S (n, $\mu_{zx}$ ) | S (n, $\mu_{zy}$ ) | S (n, $\mu_{zz}$ ) |
|-----------|--------------------|--------------------|--------------------|--------------------|--------------------|--------------------|
| 79        | 0.02               | 0.05               | 0.16               | 0.01               | 0.16               | 0.05               |
| 80        | 0.12               | 0.01               | 0.00               | 0.00               | 0.01               | 0.01               |
| 81        | 0.01               | 0.05               | 0.01               | 0.00               | 0.01               | 0.06               |
| 82        | 0.01               | 0.00               | 0.01               | 0.31               | 0.02               | 0.00               |
| 83        | 0.09               | 0.01               | 0.01               | 0.07               | 0.01               | 0.00               |
| 84        | 0.25               | 0.02               | 0.01               | 0.04               | 0.01               | 0.00               |
| 85        | 0.12               | 0.01               | 0.00               | 0.01               | 0.00               | 0.03               |
| 86        | 0.06               | 0.01               | 0.00               | 0.00               | 0.00               | 0.01               |
| 87        | 0.00               | 0.00               | 0.01               | 0.05               | 0.01               | 0.00               |
| 88        | 0.01               | 0.01               | 0.00               | 0.00               | 0.00               | 0.02               |
| 89        | 0.00               | 0.00               | 0.01               | 0.00               | 0.01               | 0.00               |
| 90        | 0.01               | 0.06               | 0.00               | 0.00               | 0.00               | 0.06               |
| 91        | 0.00               | 0.00               | 0.06               | 0.01               | 0.06               | 0.00               |
| 92        | 0.00               | 0.00               | 0.01               | 0.00               | 0.01               | 0.01               |
| 93        | 0.00               | 0.02               | 0.04               | 0.00               | 0.05               | 0.02               |
| 94        | 0.00               | 0.04               | 0.02               | 0.01               | 0.03               | 0.04               |
| 95        | 0.00               | 0.24               | 0.00               | 0.00               | 0.01               | 0.23               |
| 96        | 0.02               | 0.04               | 0.04               | 0.01               | 0.03               | 0.04               |
| 97        | 0.01               | 0.03               | 0.04               | 0.01               | 0.04               | 0.05               |
| 98        | 0.01               | 0.04               | 0.00               | 0.00               | 0.00               | 0.04               |
| 99        | 0.00               | 0.01               | 0.00               | 0.01               | 0.00               | 0.01               |
| 100       | 0.01               | 0.06               | 0.00               | 0.00               | 0.00               | 0.08               |
| 101       | 0.00               | 0.13               | 0.00               | 0.00               | 0.00               | 0.14               |
| 102       | 0.00               | 0.00               | 0.05               | 0.00               | 0.05               | 0.01               |
| 103       | 0.00               | 0.08               | 0.01               | 0.00               | 0.00               | 0.02               |

Table S2: Continued from previous page

| Modes (n) | S (n, $\mu_{yx}$ ) | S (n, $\mu_{yy}$ ) | S (n, $\mu_{yz}$ ) | S (n, $\mu_{zx}$ ) | S (n, $\mu_{zy}$ ) | S (n, $\mu_{zz}$ ) |
|-----------|--------------------|--------------------|--------------------|--------------------|--------------------|--------------------|
| 104       | 0.00               | 0.25               | 0.01               | 0.00               | 0.01               | 0.25               |
| 105       | 0.00               | 0.00               | 0.25               | 0.00               | 0.25               | 0.01               |
| 106       | 0.10               | 0.00               | 0.00               | 0.01               | 0.00               | 0.00               |
| 107       | 0.05               | 0.00               | 0.01               | 0.08               | 0.01               | 0.01               |
| 108       | 0.09               | 0.01               | 0.00               | 0.01               | 0.00               | 0.01               |
| 109       | 0.01               | 0.00               | 0.01               | 0.13               | 0.01               | 0.00               |
| 110       | 0.20               | 0.02               | 0.01               | 0.01               | 0.00               | 0.02               |
